# Supplementary material
Source: ML conference proceedings conference paper supplement (https://openaccess.thecvf.com/content/ACCV2022/html/Tayyub_Explaining_Deep_Neural_ACCV_2022_paper.html)
Supplement: Supplementary file 2 [file Tayyub_Explaining_Deep_Neural_ACCV_2022_supplemental.zip]

Archive with 2 entries (2 files):
- 0406-supp.pdf
- New video.mp4
